# Supplementary material for: Feasibility and safety of mass drug coadministration with azithromycin and ivermectin for the control of neglected tropical diseases: a single-arm intervention trial
Source: PubMed Central journal article supplement (PMC6139784; doi:10.1016/s2214-109x(18)30397-8), 2018-09-14
Supplement: mmc1.pdf [file mmc1.pdf]

# THE LANCET

## Global Health

### Supplementary appendix

This appendix formed part of the original submission and has been peer reviewed. We post it as supplied by the authors.

Supplement to: Romani L, Marks M, Sokana O, et al. Feasibility and safety of mass drug coadministration with azithromycin and ivermectin for the control of neglected tropical diseases: a single-arm intervention trial. *Lancet Glob Health* 2018; **6**: e1132–38.

## SUPPLEMENTARY TABLES

**Supplementary Table 1.A: Azithromycin and ivermectin tablet dosing**

| WEIGHT       | AZITHROMYCIN TABLETS<br>(250mg Tabs) | IVERMECTIN TABLETS<br>(3mg Tabs) |
|--------------|--------------------------------------|----------------------------------|
| <12.5KG      | POS*                                 | Permethrin cream                 |
| 12.5 – 25 KG | 1                                    | 1                                |
| 25 – 37.5 KG | 2                                    | 2                                |
| 37.5 – 50 KG | 3                                    | 3                                |
| 50-75 KG     | 4                                    | 4                                |
| >75 KG       | 4                                    | 5                                |

\*Azithromycin powder for oral suspension

**Supplementary Table 1.B: Azithromycin powder for oral suspension dosing**

| WEIGHT    | NUMBER OF ML      |
|-----------|-------------------|
| <3 KG     | Check with Doctor |
| 3-6 KG    | 2ml               |
| 6 -9 KG   | 4ml               |
| 9 -12 KG  | 6ml               |
| 12-15 KG  | 8ml               |
| 15 -18 KG | 10ml              |
| 18-21 KG  | 12ml              |
| 21-24 KG  | 14ml              |
| 24 KG     | 16ml              |

**Supplementary Table 1.C: Dosing for special situations**

|                      | TRACHOMA                     | SCABIES          |
|----------------------|------------------------------|------------------|
| Pregnancy            | Azithromycin tablets         | Permethrin cream |
| Breastfeeding        | Azithromycin tablets         | Permethrin cream |
| Child under 12.5kg   | Azithromycin oral suspension | Permethrin cream |
| Child under 6 months | Topical tetracycline         | Permethrin cream |

**Supplementary Table 2. Number of hospital admissions and deaths in Choiseul Province 12 months before and after MDA (MDA was conducted in September 2015)**

| <b>Month</b>   | <b>Admissions</b> | <b>Deaths</b> |
|----------------|-------------------|---------------|
| September 2014 | 106               | 6             |
| October 2014   | 110               | 6             |
| November 2014  | 100               | 3             |
| December 2014  | 106               | 6             |
| January 2015   | 141               | 4             |
| February 2015  | 133               | 6             |
| March 2015     | 167               | 7             |
| April 2015     | 150               | 7             |
| May 2015       | 126               | 8             |
| June 2015      | 159               | 11            |
| July 2015      | 102               | 5             |
| August 2015    | 130               | 4             |
| September 2015 | 165               | 5             |
| October 2015   | 84                | 2             |
| November 2015  | 109               | 5             |
| December 2015  | 106               | 6             |
| January 2016   | 187               | 17            |
| February 2016  | 116               | 4             |
| March 2016     | 183               | 7             |
| April 2016     | 164               | 4             |
| May 2016       | 232               | 8             |
| June 2016      | 111               | 9             |
| July 2016      | 92                | 4             |
| August 2016    | 113               | 9             |
| September 2016 | 105               | 8             |
